# Supplementary material
Source: publisher figshare collection journal article supplement (https://geolsoc.figshare.com/ndownloader/files/30703140)
Supplement: Supplementary file 1 [file 30703140]

## Sheet: PANAREA
Differences between McBride and Picard (1987) and our roundness calculation technique. PN-11: tested sample. Key to grain shape categories. 1 = very angular; 2 = angular; 3 = sub-angular; 4 = sub-rounded; 5 = rounded; 6 = well rounded.
	Lvl grains*						Lvl tot	Lvl Mean	Lvmi grains*						Lvmi tot	Lvmi Mean	Lvv grains*						Lvv tot	Lvv Mean	Plag grains*						Plag tot	Plag Mean	Py grains*						Py tot	Py Mean	Hb grains*						Hb tot	Hb Mean
Sample#	1	2	3	4	5	6	grains	Roundness	1	2	3	4	5	6	grains	Roundness	1	2	3	4	5	6	grains	Roundness	1	2	3	4	5	6	grains	Roundness	1	2	3	4	5	6	grains	Roundness	1	2	3	4	5	6	grains	Roundness
PN-1-Vc	89	125	15	0	0	0	229	1.67686	0	12	5	0	0	0	17	2.29412	1	4	0	0	0	0	5	1.8	16	8	0	0	0	0	24	1.33333	4	7	0	0	0	0	11	1.63636	3	4	0	0	0	0	7	1.57143
PN-1-C	69	129	14	0	0	0	212	1.74057	10	26	8	0	0	0	44	1.95455	5	3	1	0	0	0	9	1.55556	36	28	0	0	0	0	64	1.4375	12	5	1	0	0	0	18	1.38889	11	0	0	0	0	0	11	1
PN-1-m	11	53	8	0	0	0	72	1.95833	17	37	9	0	0	0	63	1.87302	26	26	12	1	0	0	65	1.81538	54	25	2	0	0	0	81	1.35802	8	18	3	0	0	0	29	1.82759	12	6	0	0	0	0	18	1.33333
PN-1-f	11	22	1	0	0	0	34	1.70588	20	45	11	0	0	0	76	1.88158	32	10	3	12	2	0	59	2.01695	27	10	2	0	0	0	39	1.35897	22	20	7	6	0	0	55	1.94545	24	9	0	0	0	0	33	1.27273
PN-1-Vf	2	5	2	0	0	0	9	2	10	48	19	0	0	0	77	2.11688	36	45	9	1	0	0	91	1.72527	28	10	3	0	0	0	41	1.39024	18	11	5	0	0	0	34	1.61765	19	9	0	0	0	0	28	1.32143
PN-2-m	64	85	20	6	2	0	177	1.85311	43	79	26	11	3	0	162	2.08642	1	1	0	0	0	0	2	1.5	10	12	3	0	0	0	25	1.72	2	3	0	0	0	0	5	1.6	3	4	0	0	0	0	7	1.57143
PN-3-m	36	94	26	7	2	0	165	2.06061	35	78	34	14	2	0	163	2.20245	0	4	0	0	0	0	4	2	15	14	3	0	0	0	32	1.625	4	11	1	0	0	0	16	1.8125	2	6	0	0	0	0	8	1.75
PN-4-m	13	114	33	0	0	0	160	2.125	6	86	21	4	0	0	117	2.19658	5	36	5	0	0	0	46	2	1	6	2	0	0	0	9	2.11111	0	1	0	0	0	0	1	2	0	1	0	0	0	0	1	2
PN-5-m	4	63	14	3	0	0	84	2.19048	5	62	20	8	0	0	95	2.32632	16	66	36	3	4	0	125	2.304	15	47	10	0	0	0	72	1.93056	0	0	0	0	0	0	0	0	0	0	0	0	0	0	0	0
PN-6-m	14	75	16	3	0	0	108	2.07407	5	40	11	0	0	0	56	2.10714	21	85	24	5	0	0	135	2.0963	2	13	4	0	0	0	19	2.10526	5	2	1	0	0	0	8	1.5	2	0	0	0	0	0	2	1
PN-7-m	29	92	31	13	0	0	165	2.1697	4	33	19	8	0	0	64	2.48438	5	11	5	0	0	0	21	2	8	16	0	1	0	0	25	1.76	7	15	3	0	0	0	25	1.84	6	7	0	0	0	0	13	1.53846
PN-8-m	19	61	62	31	6	0	179	2.68715	2	38	38	10	10	0	98	2.87755	9	2	4	0	6	0	21	2.61905	7	16	1	1	0	0	25	1.84	1	0	0	0	0	0	1	1	2	3	0	0	0	0	5	1.6
PN-9-m	0	30	48	58	5	0	141	3.2695	0	12	52	33	6	0	103	3.32039	3	8	6	3	0	0	20	2.45	13	19	13	2	0	0	47	2.08511	1	17	8	0	0	0	26	2.26923	0	10	0	0	0	0	10	2
PN-10-m	2	79	63	19	8	3	174	2.77586	3	42	50	12	0	0	107	2.66355	7	12	14	4	0	0	37	2.40541	2	8	5	0	0	0	15	2.2	0	5	4	0	0	0	9	2.44444	0	4	0	0	0	0	4	2
PN-11-m	21	54	38	24	7	0	144	2.59722	11	41	47	14	3	0	116	2.62931	5	12	17	5	1	0	40	2.625	10	18	5	2	5	0	40	2.35	1	7	0	1	0	0	9	2.11111	1	3	0	0	0	0	4	1.75
PN-11-m30	7	11	9	3	0	0	30	2.26667	1	14	12	3	0	0	30	2.56667	4	10	12	3	1	0	30	2.56667	8	15	5	2	0	0	30	2.03333	˗	˗	˗	˗	˗	˗	˗	˗	˗	˗	˗	˗	˗	˗	˗	˗
							ΔAVGLvl=	0.330556							ΔAVGLvmi=	0.0626437							ΔAVGLvv=	0.0583333							ΔAVGPlag=	0.316667

## Sheet: STROMBOLI
Key to grain shape categories. 1 = very angular; 2 = angular; 3 = sub-angular; 4 = sub-rounded; 5 = rounded; 6 = well rounded.
	Lvl grains*						Lvl tot	Lvl Mean	Lvmi grains*						Lvmi tot	Lvmi Mean	Lvv grains*						Lvv tot	Lvv Mean
Sample	1	2	3	4	5	6	grains	Roundness	1	2	3	4	5	6	grains	Roundness	1	2	3	4	5	6	grains	Roundness
STR-1-Vc	50	97	64	26	5	1	243	2.34979	0	1	1	0	0	0	2	2.5	0	5	1	2	0	0	8	2.625
STR-1-C	17	181	71	21	3	0	293	2.35836	4	15	7	0	0	0	26	2.11538	1	13	6	0	0	0	20	2.25
STR-1-m	2	61	57	42	10	0	172	2.98256	0	18	22	23	11	0	74	3.36486	3	23	17	13	7	0	63	2.96825
STR-1-f	1	64	30	3	0	0	98	2.35714	6	53	24	12	0	0	95	2.44211	16	30	15	2	0	0	63	2.04762
STR-1-Vf	2	11	6	0	0	0	19	2.21053	7	44	18	2	0	0	71	2.21127	17	30	7	1	0	0	55	1.85455
STR-2-m	0	25	39	24	20	0	108	3.36111	0	4	7	5	0	0	16	3.0625	0	3	3	1	4	0	11	3.54545
STR-3-m	2	85	115	43	7	0	252	2.87302	0	18	38	7	0	0	63	2.8254	0	5	1	1	0	0	7	2.42857
STR-4-m	0	107	96	26	1	0	230	2.65652	0	27	29	5	0	0	61	2.63934	0	15	7	1	0	0	23	2.3913
STR-5-m	9	83	86	32	1	0	211	2.68246	2	21	36	11	0	0	70	2.8	2	10	16	11	0	0	39	2.92308
STR-7-m	3	131	72	17	0	0	223	2.46188	2	42	35	5	0	0	84	2.5119	2	13	7	1	0	0	23	2.30435
STR-8-m	8	118	66	24	3	0	219	2.52511	2	26	18	1	0	0	47	2.38298	5	11	4	0	0	0	20	1.95
STR-9-Vc	96	60	4	1	0	0	161	1.44099	8	5	1	0	0	0	14	1.5	11	5	0	0	0	0	16	1.3125
STR-9-C	177	104	42	8	1	0	332	1.6506	16	12	2	0	0	0	30	1.53333	24	5	0	0	0	0	29	1.17241
STR-9-m	54	121	60	5	0	0	240	2.06667	16	39	13	1	0	0	69	1.98551	18	26	6	0	0	0	50	1.76
STR-9-f	22	97	27	1	0	0	147	2.04762	43	48	16	0	0	0	107	1.74766	37	28	8	0	0	0	73	1.60274
STR-9-Vf	4	33	7	1	0	0	45	2.11111	26	50	12	0	0	0	88	1.84091	71	92	31	0	0	0	194	1.79381
	Plag grains*						Plag tot	Plag Mean	Py grains*						Py tot	Py Mean	Ol grains*						Ol tot	Ol Mean
Sample	1	2	3	4	5	6	grains	Roundness	1	2	3	4	5	6	grains	Roundness	1	2	3	4	5	6	grains	Roundness
STR-1-Vc	0	3	1	0	0	0	4	2.25	2	9	7	5	0	0	23	2.65217	0	2	1	3	0	0	6	3.16667
STR-1-C	0	5	1	0	0	0	6	2.16667	8	33	7	0	0	0	48	1.97917	1	3	0	1	0	0	5	2.2
STR-1-m	0	7	4	0	0	0	11	2.36364	1	26	12	5	2	0	46	2.58696	1	17	7	2	1	0	28	2.46429
STR-1-f	4	31	3	0	0	0	38	1.97368	8	58	6	0	0	0	72	1.97222	2	13	3	1	0	0	19	2.15789
STR-1-Vf	15	31	5	3	0	0	54	1.92593	37	79	12	0	0	0	128	1.80469	19	22	7	4	0	0	52	1.92308
STR-2-m	0	2	1	0	0	0	3	2.33333	3	86	58	40	2	0	189	2.74603	0	16	8	29	17	0	70	3.67143
STR-3-m	0	10	5	0	0	0	15	2.33333	2	22	18	0	0	0	42	2.64	0	3	0	1	0	0	4	2.5
STR-4-m	3	10	1	0	0	0	14	1.85714	0	32	25	5	0	0	62	2.56452	0	2	0	0	0	0	2	2
STR-5-m	1	11	3	1	0	0	16	2.25	6	17	16	5	0	0	44	2.45455	2	6	1	0	1	0	10	2.2
STR-7-m	3	9	6	0	0	0	18	2.16667	6	27	6	0	0	0	39	2	0	3	1	0	0	0	4	2.25
STR-8-m	3	5	2	0	0	0	10	1.9	16	53	18	3	0	0	90	2.08889	2	6	0	0	0	0	8	1.75
STR-9-Vc	0	0	0	0	0	0	0	0	7	2	0	0	0	0	9	1.22222	0	0	0	0	0	0	0	0
STR-9-C	0	1	0	0	0	0	1	2	3	3	0	0	0	0	6	1.5	0	1	0	0	0	0	1	2
STR-9-m	1	15	3	0	0	0	19	2.10526	1	10	3	1	0	0	15	2.26667	1	2	0	1	0	0	4	2.25
STR-9-f	6	20	5	0	0	0	31	1.96774	9	16	2	0	0	0	27	1.74074	3	3	0	0	0	0	6	1.5
STR-9-Vf	3	23	4	0	0	0	30	2.03333	0	19	2	0	0	0	21	2.09524	3	4	2	0	0	0	9	1.88889

## Sheet: VULCANO
Key to grain shape categories. 1 = very angular; 2 = angular; 3 = sub-angular; 4 = sub-rounded; 5 = rounded; 6 = well rounded.
	Lvl grains*						Lvl tot	Lvl Mean	Lvmi grains*						Lvmi tot	Lvmi Mean	Lvv grains*						Lvv tot	Lvv Mean
Sample	1	2	3	4	5	6	grains	Roundness	1	2	3	4	5	6	grains	Roundness	1	2	3	4	5	6	grains	Roundness
V1-m	144	17	28	68	26	5	288	2.40972	39	0	5	14	15	3	76	2.7	11	4	7	0	0	0	22	1.818
V2-m	21	40	90	36	5	2	194	2.84	0	4	22	20	3	3	52	3.59	5	8	0	0	0	0	13	1.61
V4-m	4	23	59	37	8	6	137	3.29	0	11	47	41	0	0	99	3.3	2	4	0	0	0	0	6	1.66
V5-m	26	69	46	16	3	1	161	2.4	2	21	29	35	11	6	104	3.48	15	12	2	0	0	0	29	1.55
V6-m	29	78	51	15	7	4	184	2.48	3	21	28	20	9	7	88	3.36	12	11	0	0	0	0	23	1.47
V7-m	8	28	55	29	12	1	133	3.09	0	2	34	41	12	8	97	3.89	9	8	5	0	0	0	22	1.81
V8-m	7	38	64	40	14	2	165	3.13	0	9	28	31	22	11	101	3.98	9	11	0	0	0	0	20	1.55
V9-m	0	19	25	32	11	5	92	3.54	0	0	15	28	17	0	60	4	7	9	5	2	0	0	23	2.08
V10-m	9	29	50	47	20	7	162	3.37	0	2	12	19	14	11	58	4.34	8	9	0	0	0	0	17	1.52
V11-m	17	29	35	31	11	2	125	2.96	2	11	29	35	16	5	98	3.68	6	8	1	0	0	0	15	1.66
V12-m	2	15	19	14	5	0	55	3.09	0	2	14	17	9	5	47	4.02	4	3	0	0	0	0	7	1.42
	Ol grains*						Ol tot	Ol Mean	Plag grains*						Plag tot	Plag Mean	Py grains*						Py tot	Py Mean
Sample	1	2	3	4	5	6	grains	Roundness	1	2	3	4	5	6	grains	Roundness	1	2	3	4	5	6	grains	Roundness
V1-m	0	0	3	4	1	0	8	3.7	40	2	16	17	4	1	80	2.325	158	17	77	60	4	0	316	2.16139
V2-m	0	0	3	4	0	0	7	3.57	1	12	18	1	0	0	32	2.59	9	57	27	5	0	0	98	2.28
V4-m	0	0	1	3	2		6	4.16	2	12	21	7	1	0	43	2.83	11	22	33	9	2	0	77	2.59
V5-m	0	0	3	3	1	0	7	3.7	6	22	12	1	0	0	41	2.2	11	32	9	0	0	0	52	1.96
V6-m	0	1	1	1	0	0	3	3	8	27	10	2	0	0	47	2.12	12	17	15	0	0	0	44	2.06
V7-m	0	1	2	2	1	1	7	3.8	1	8	15	13	2	0	39	3.17	17	29	44	2	0	0	92	2.33
V8-m	0	0	1	2	1	0	4	4	1	12	14	15	2	0	44	3.11	7	24	19	5	0	0	55	2.4
V9-m	0	0	3	7	6	2	18	4.38	0	4	15	17	4	0	40	3.52	28	58	48	9	2	0	145	2.3
V10-m	0	1	3	3	3	2	12	4.16	5	12	15	19	4	0	55	3.09	16	24	21	19	0	0	80	2.53
V11-m	0	0	4	5	4	2	15	4.26	9	19	15	8	0	0	51	2.43	25	32	24	2	0	0	83	2.03
V12-m	0	0	4	5	3	2	14	4.21	7	17	19	7	0	0	50	2.52	28	84	74	14	0	0	200	2.37

## Sheet: SALINA
Key to grain shape categories. 1 = very angular; 2 = angular; 3 = sub-angular; 4 = sub-rounded; 5 = rounded; 6 = well rounded.
	Lvl grains*						Lvl tot	Lvl Mean	Lvmi grains*						Lvmi tot	Lvmi Mean	Lvv grains*						Lvv tot	Lvv Mean
Sample	1	2	3	4	5	6	grains	Roundness	1	2	3	4	5	6	grains	Roundness	1	2	3	4	5	6	grains	Roundness
SA-1-Vc	16	111	96	45	3	0	271	2.66052	0	10	11	22	0	0	43	3.27907	1	12	12	7	0	0	32	2.78
SA-1-C	21	75	80	45	7	0	228	2.74	4	20	32	22	3	0	81	3	7	11	12	5	0	0	35	2.428
SA-1-m	6	45	62	51	3	0	167	3	1	18	23	35	4	0	81	3.28	2	11	19	13	2	0	47	3.04
SA-1-f	2	14	15	3	2	0	36	2.69	0	10	33	57	6	0	106	3.55	10	39	15	6	0	0	70	2.24
SA-1-Vf	0	0	0	0	0	0	0	0	0	2	8	19	0	0	29	3.58	7	46	32	14	0	0	99	2.53
SA-2-m	8	42	65	45	4	0	164	2.96	1	9	20	35	7	0	72	3.52	14	21	9	1	0	0	45	1.93
SA-3-m	3	46	75	26	2	0	152	2.85	0	6	23	30	3	0	62	3.48	2	14	8	3	0	0	27	2.44
SA-4-m	20	51	83	21	0	0	175	2.6	3	14	26	40	4	0	87	3.32	5	24	14	1	0	0	44	2.25
SA-5-m	0	31	61	52	1	0	145	3.15	0	4	24	46	5	0	79	3.65	1	20	25	16	3	0	65	3
SA-6-m	1	47	106	68	7	0	229	3.14	0	4	26	31	4	0	65	3.53	9	32	11	4	0	0	56	2.17
SA-7-m	30	113	97	18	3	0	261	2.42	0	6	21	20	0	0	47	3.29	17	24	7	3	0	0	51	1.92
SA-8-m	5	63	79	44	4	0	195	2.89	1	9	21	25	1	0	57	3.28	1	15	8	3	0	0	27	2.48
SA-9-m	9	63	79	38	3	0	192	2.8	0	8	19	30	4	0	61	3.49	6	27	8	3	0	0	44	2.18
SA-10-m	4	42	92	22	2	0	162	2.85	0	5	35	44	6	0	90	3.55	6	18	14	6	0	0	44	2.45
SA-11-m	1	30	93	32	5	1	162	3.08	1	12	35	44	1	0	93	3.34	3	18	10	4	0	0	35	2.42
SA-12-m	10	36	80	25	5	1	157	2.88	5	12	29	35	4	0	85	3.24	2	6	5	0	0	0	13	2.23
SA-13-m	10	41	91	29	7	1	179	2.91	6	9	30	41	8	2	96	3.43	0	5	4	0	0	0	9	2.44
SA-14-m	0	36	103	55	3	1	198	3.14	0	2	23	32	3	0	60	3.6	2	15	12	1	0	0	30	2.4
SA-15-m	3	33	80	36	2	0	154	3	0	4	28	61	15	0	108	3.8	4	17	7	1	0	0	29	2.17
	Plag grains*						Plag tot	Plag Mean	Py grains*						Py tot	Py Mean	Op grains*						Op tot	Op Mean
Sample	1	2	3	4	5	6	grains	Roundness	1	2	3	4	5	6	grains	Roundness	1	2	3	4	5	6	grains	Roundness
SA-1-Vc	0	0	0	0	0	0	0	0	0	0	0	0	0	0	0	0	0	0	0	0	0	0	0	0
SA-1-C	3	8	4	1	0	0	16	2.18	4	7	1	0	0	0	12	1.75	0	0	0	0	0	0	0	0
SA-1-m	3	16	12	10	0	0	41	2.7	6	11	8	5	0	0	30	2.4	1	1	2	3	0	0	7	3
SA-1-f	2	10	17	4	0	0	33	2.69	15	32	24	6	0	0	77	2.27	0	7	13	14	2	0	36	3.3
SA-1-Vf	6	16	4	0	0	0	26	1.92	15	51	33	9	2	0	110	2.38	1	14	28	33	26	12	114	3.92
SA-2-m	2	19	20	4	1	0	46	2.63	5	14	13	4	0	0	36	2.44	0	0	2	3	0	0	5	3.6
SA-3-m	1	14	14	4	1	0	34	2.7	11	36	28	16	1	0	92	2.56	0	3	5	4	0	0	12	3.08
SA-4-m	3	18	12	3	0	0	36	2.41	3	13	8	2	0	0	26	2.34	0	1	2	3	1	0	7	3.51
SA-5-m	1	10	8	4	0	0	23	2.65	1	6	5	2	0	0	14	2.57	0	0	0	0	0	0	0	0
SA-6-m	0	9	12	7	0	0	28	2.92	0	4	5	1	0	0	10	2.7	0	0	0	0	0	0	0	0
SA-7-m	0	8	16	6	0	0	30	2.93	1	4	5	1	0	0	11	2.54	0	0	0	0	0	0	0	0
SA-8-m	4	12	13	4	0	0	33	2.51	7	21	15	9	0	0	52	2.5	0	1	3	3	0	0	7	3.28
SA-9-m	2	7	16	7	4	0	36	3.11	3	12	23	8	2	0	48	2.875	0	0	0	0	0	0	0	0
SA-10-m	1	12	20	4	0	0	37	2.79	3	10	20	6	0	0	39	2.74	0	1	2	4	1	0	8	3.62
SA-11-m	0	9	22	5	0	0	36	2.88	4	17	14	8	0	0	43	2.6	0	1	3	2	1	0	7	3.42
SA-12-m	2	11	22	8	1	0	44	2.88	6	16	21	17	2	0	62	2.88	0	1	1	2	0	0	4	3.25
SA-13-m	1	5	16	13	1	0	36	3.22	7	10	10	11	2	0	40	2.77	0	1	6	5	0	0	12	3.33
SA-14-m	1	8	21	10	1	0	41	3.04	3	10	12	10	0	0	35	2.82	0	0	0	0	0	0	0	0
SA-15-m	2	15	21	7	1	0	46	2.78	0	4	3	0	0	0	7	2.42	0	0	0	0	0	0	0	0

## Sheet: FILICUDI
Key to grain shape categories. 1 = very angular; 2 = angular; 3 = sub-angular; 4 = sub-rounded; 5 = rounded; 6 = well rounded.
	Lvl grains*						Lvl tot	Lvl Mean	Lvmi grains*						Lvmi tot	Lvmi Mean	Lvv grains*						Lvv tot	Lvv Mean
Sample	1	2	3	4	5	6	grains	Roundness	1	2	3	4	5	6	grains	Roundness	1	2	3	4	5	6	grains	Roundness
Fi-1-m	0	19	78	56	5	0	158	3.29	0	1	37	41	2	0	81	3.54	4	17	9	0	0	0	30	2.16
Fi-2-m	0	19	50	46	9	1	125	3.38	0	2	23	38	9	0	72	3.75	2	10	5	3	0	0	20	2.45
Fi-3-Vc	8	101	90	10	1	0	210	2.5	0	1	7	11	0	0	19	3.5	7	9	0	0	0	0	16	1.56
Fi-3-C	12	81	128	71	7	1	300	2.94	2	8	15	21	0	0	46	3.19	5	12	4	1	0	0	22	2.04
Fi-3-m	6	51	94	44	8	0	203	2.98	0	6	41	34	6	2	89	3.51	9	25	11	0	0	0	45	2.04
Fi-3-f	14	18	47	20	1	0	100	2.76	3	18	47	68	7	3	146	3.45	7	15	6	0	0	0	28	1.96
Fi-3-Vf	0	11	28	15	2	0	56	3.14	0	17	69	87	21	0	194	3.57	10	34	41	7	1	0	93	2.51
Fi-4-m	11	62	91	19	0	0	183	2.64	1	6	28	40	1	0	76	3.44	9	12	4	0	0	0	25	1.8
	Plag grains*						Plag tot	Plag Mean	Py grains*						Py tot	Py Mean	Op grains*						Op tot	Op Mean
Sample	1	2	3	4	5	6	grains	Roundness	1	2	3	4	5	6	grains	Roundness	1	2	3	4	5	6	grains	Roundness
Fi-1-m	0	4	8	1	0	0	13	2.76	3	32	35	20	1	0	91	2.82	0	1	7	6	0	0	14	3.35
Fi-2-m	0	3	14	15	0	0	32	3.37	1	14	21	18	2	0	56	3.1	0	0	0	0	0	0	0	0
Fi-3-Vc	0	3	2	0	0	0	5	2.4	1	5	3	0	0	0	9	2.22	0	0	0	0	0	0	0	0
Fi-3-C	0	7	9	3	0	0	19	2.78	2	3	3	1	0	0	9	2.33	0	0	0	0	0	0	0	0
Fi-3-m	0	4	24	11	0	0	39	3.17	0	4	12	8	0	0	24	3.16	0	0	0	0	0	0	0	0
Fi-3-f	3	13	17	2	0	0	35	2.51	1	9	10	3	2	1	26	2.96	0	0	0	0	0	0	0	0
Fi-3-Vf	0	4	12	1	0	0	17	2.82	1	8	10	1	0	0	20	2.55	1	8	10	1	0	0	20	2.55
Fi-4-m	1	9	14	6	0	0	30	2.83	2	13	15	2	0	0	32	2.53	0	2	7	13	0	0	22	3.5

## Sheet: ALICUDI
Key to grain shape categories. 1 = very angular; 2 = angular; 3 = sub-angular; 4 = sub-rounded; 5 = rounded; 6 = well rounded.
	Lvl grains*						Lvl tot	Lvl Mean	Lvmi grains*						Lvmi tot	Lvmi Mean	Lvv grains*						Lvv tot	Lvv Mean
Sample	1	2	3	4	5	6	grains	Roundness	1	2	3	4	5	6	grains	Roundness	1	2	3	4	5	6	grains	Roundness
AL-1-m	2	30	96	38	2	0	168	3.04	0	1	23	52	5	0	81	3.75	4	22	13	2	0	0	41	2.31
AL-2-m	10	48	147	42	9	0	256	2.96	0	2	17	31	3	53	3.66	3	3	8	3	2	0	0	16	3.25
AL-3-Vc	30	76	69	9	0	0	184	2.3	0	6	8	5	0	0	19	2.94	14	11	1	0	0	0	26	1.5
AL-3-C	36	99	115	10	0	0	260	2.38	4	18	29	8	0	0	59	2.69	17	22	10	1	0	0	50	1.9
AL-3-m	10	41	85	21	1	0	158	2.75	5	15	37	15	2	0	74	2.91	16	38	14	0	0	0	68	1.97
AL-3-f	2	25	64	16	0	1	108	2.9	4	27	65	30	1	0	127	2.97	17	22	10	1	0	0	50	1.9
AL-3-Vf	0	10	25	4	0	0	39	2.84	1	17	65	43	1	0	127	3.2	8	53	21	1	1	0	84	2.21
AL-4-C	16	72	114	34	9	0	275	2.78	0	15	35	23	0	0	73	3.1	11	22	17	1	0	0	51	2.15
AL-5-m	16	63	119	26	5	0	229	2.74	0	5	27	12	0	0	44	3.15	9	30	10	1	0	0	50	2.06
AL-6-m	13	53	111	32	12	0	221	2.89	0	7	25	47	0	0	79	3.5	2	17	11	2	0	0	32	2.4
AL-7-m	14	59	108	24	3	0	208	2.72	0	5	18	30	5	0	58	3.6	8	22	8	0	0	0	38	2
	Plag grains*						Plag tot	Plag Mean	Py grains*						Py tot	Py Mean	Ol grains*						Ol tot	Ol Mean
Sample	1	2	3	4	5	6	grains	Roundness	1	2	3	4	5	6	grains	Roundness	1	2	3	4	5	6	grains	Roundness
AL-1-m	4	10	23	7	0	0	44	2.75	1	8	15	11	1	0	36	3.08	0	2	1	2	1	0	6	3.33
AL-2-m	3	11	23	9	4	0	50	3	3	4	8	1	0	0	16	2.43	0	1	1	0	0	0	2	2.5
AL-3-Vc	1	4	7	0	0	0	12	2.5	0	3	2	0	0	0	5	2.4	0	0	0	0	0	0	0	0
AL-3-C	2	6	5	1	0	0	14	2.35	3	11	9	2	0	0	25	2.4	0	0	0	0	0	0	0	0
AL-3-m	1	12	21	2	0	0	36	2.66	4	17	15	3	0	0	39	2.43	0	3	2	0	0	0	5	2.4
AL-3-f	3	17	21	4	0	0	45	2.57	3	18	26	4	2	0	53	2.69	0	1	2	3	0	0	6	3.33
AL-3-Vf	0	24	34	2	0	0	60	2.63	1	28	39	4	0	0	72	2.63	0	6	6	4	1	0	17	3
AL-4-C	1	3	8	0	0	0	12	2.58	0	6	13	0	0	0	19	2.68	0	0	0	0	0	0	0	0
AL-5-m	2	10	13	4	4	0	33	2.93	3	17	10	3	2	0	35	2.54	0	2	3	2	2	0	9	3.44
AL-6-m	1	7	12	2	0	0	22	2.68	4	11	19	7	2	0	43	2.81	0	0	0	1	1	0	2	4.5
AL-7-m	1	6	16	3	1	0	27	2.88	4	27	22	7	1	0	61	2.57	0	2	4	2	0	0	8	3

## Sheet: LIPARI
For Lipari data see Morrone et al. 2018.
